# Supplementary material for: Effect of acute pesticide exposure on bee spatial working memory using an analogue of the radial-arm maze
Source: PubMed Central journal article supplement (PMC5154185; doi:10.1038/srep38957), 2016-12-13
Supplement: srep38957-s1.pdf [file srep38957-s1.pdf]

# Supporting Information

## Effect of acute pesticide exposure on bee spatial working memory using an analogue of the radial-arm maze

Elizabeth E. W. Samuelson<sup>a\*</sup>, Zachary P. Chen-Wishart<sup>b</sup>, Richard J. Gill<sup>c</sup> &

Ellouise Leadbeater<sup>a</sup>

<sup>a</sup> School of Biological Sciences, Royal Holloway University of London, Egham, United Kingdom

<sup>b</sup> Department of Physics, Royal Holloway University of London, Egham, United Kingdom

<sup>c</sup> Department of Life Sciences, Imperial College London, Silwood Park campus, Ascot, United

Kingdom

\*Corresponding author: [elizabeth.samuelson.2014@live.rhul.ac.uk](mailto:elizabeth.samuelson.2014@live.rhul.ac.uk)

## Supporting Methods

### Pesticide treatment

Thiamethoxam doses were calculated to simulate a bee foraging for one hour on oilseed rape nectar contaminated with thiamethoxam at two concentrations over a range that can be found in the field: 2.4ppb, based on residues found in *B. terrestris* nectar pots (Thompson *et al.* 2013) and oilseed rape nectar in honeybee crops (Pilling *et al.* 2013) and 10ppb, based on residues in nectar of treated plants (Pohorecka *et al.* 2012; Sanchez-Bayo & Goka 2014). A foraging worker must consume 0.54 calories per minute (Heinrich 1979), so 32.4 calories are required to sustain a foraging trip of one hour. The mean sugar content of ‘Samourai’ oilseed rape nectar is 21.5% (Pierre *et al.* 1999), and sugar contains approximately 4cal mg<sup>-1</sup> (Heinrich 1979). The amount of nectar (in mg) consumed for one hour of foraging can be calculated as calories required/(sugar content x cal mg<sup>-1</sup> of sugar), so a bee would need

23 to ingest 37.7mg ( $\approx\mu\text{l}$ ) of the nectar collected during an hour on oilseed rape. This equates to 0.091ng  
24 of active ingredient per bee at a 2.4ppb concentration and 0.377ng at 10ppb. This is within the range  
25 estimated for one hour of foraging in honeybees (at 10-40% sugar concentrations; EFSA 2012).

26 Feeding 37.7 $\mu\text{l}$  of sucrose solution to a bee prior to the task is likely to lower motivation, so this volume  
27 was halved and the concentration of sugar and pesticide doubled to keep the amount of active ingredient  
28 received by each bee the same. Bees were therefore fed 18.85 $\mu\text{l}$  of 43% (w/w) sucrose solution  
29 containing either 0ppb (control), 4.8ppb (0.091ng per bee), 20ppb (0.377 ng per bee) and 133ppb (2.5  
30 ng per bee) thiamethoxam. As in previous studies into acute effects of pesticides, the full dose was  
31 provided in one feed (Henry *et al.* 2012; Stanley, Smith & Raine 2015).

32 To obtain the required concentrations, we dissolved 100mg thiamethoxam ( $\text{C}_8\text{H}_{10}\text{ClN}_5\text{O}_3\text{S}$  powder;  
33 PESTANAL<sup>®</sup> analytical standard, Sigma Aldrich, Poole, UK) in 100ml distilled water to produce a 1  
34 ppt stock solution. Each fortnight aliquots of 1.2 $\mu\text{l}$ , 5 $\mu\text{l}$  and 33.3 $\mu\text{l}$  of the stock solution were diluted  
35 with 250ml 43% Brix sucrose solution to produce 4.8ppb, 20ppb and 133ppb thiamethoxam solutions  
36 respectively.

### 37 **Radial Arm Maze (RAM) design**

38 The RAM tests working spatial memory by requiring animals to remember which reward locations they  
39 have visited and avoid revisits (Foreman & Ermakova 1998). The original RAM was designed for  
40 rodents, for which a central chamber is appropriate to prevent animals moving from one reward location  
41 to the next in a circle; i.e. it reduces (but not eliminates) the use of stereotypical behaviour so that spatial  
42 working memory can be better identified. However, this approach is not perfectly suited to all animals;  
43 in particular, flying animals may behave unnaturally in an enclosed arm set-up. As such, previous  
44 studies on birds have used “open field” versions of the RAM to mimic a more natural setting, in which  
45 no central chamber is used (Balda & Kamil 1988; Hilton & Krebs 1990; Healy & Hurly 1995); our  
46 design refers to this approach. Bumblebee within-patch foraging typically involves flying between  
47 flowers/inflorescences (Pyke & Cartar 1992), so our RAM apparatus that requires bees to fly attempts

48 to represent a more ecologically relevant foraging decision than one where bees walk through maze  
49 arms.

50 The baffles between flowers fulfil a similar role to the rodent RAM central chamber in greatly reducing  
51 but not eliminating stereotypical behaviour (bees can fly over baffles, but cannot move directly from  
52 flower to flower), and preventing bees from seeing any other flowers when on a particular flower,  
53 meaning that each represents an independent reward location (like arms of the rodent RAM) and that  
54 bees fly out of the array to see and subsequently visit the other flowers, to some degree mimicking the  
55 return from an arm to the centre of the rodent RAM (Olton & Samuelson 1976). The apparatus was  
56 located in a cue-rich laboratory environment with constant lighting during testing; cues such as arena  
57 walls and baffles did not differ between treatments and no additional landmarks were provided in the  
58 foraging arena as cue use was not being explicitly tested.

### 59 **Behaviour on the RAM**

60 The vast majority of the time, bees fed on the full 10 $\mu$ l of sucrose solution once the proboscis made  
61 contact. On the rare occasions some solution remained, the flower was exchanged for a clean, empty  
62 one as usual once the bee had left. A revisit to the most recent flower visited was only counted if >20  
63 seconds of flying occurred between visits. Exchanging visited flowers for clean ones was done from the  
64 back of the maze while the bee was feeding on its next flower to minimise disturbance.

65 For the first bout, 20 $\mu$ l droplets of sucrose solution were used to increase motivation; for the subsequent  
66 nine training bouts and the final testing bout 10 $\mu$ l drops were used to ensure all flowers could be visited  
67 before satiation. On the last flower, the experimenter increased the size of the drop to allow the bee to  
68 fill its crop and return to the colony (Burmeister, Couvillon & Bitterman 1995).

69 Access to the nest box was blocked while a bee was in the arena to encourage it to visit all eight flowers;  
70 however, if the bee made three attempts to return before visiting all eight flowers the entrance was  
71 unblocked and the bee allowed to return to the nest box to minimise loss of motivation. The entrance  
72 was also unblocked after a bee had been in the arena for longer than 20 minutes; if 30 minutes elapsed

73 the bee was guided towards the entrance with a plastic pot. In the final bout, recording of visits was  
74 stopped after 30 minutes, as a longer period in the maze may not be an accurate test of working memory.

75 To administer the pesticide dose after the tenth bout, the bee was intercepted on its way to the arena by  
76 manipulating the tunnel doors to direct the bee into a plastic pot (diameter: 60mm). After allowing the  
77 bee to acclimatise for approximately one minute, 18.85 $\mu$ l of sucrose solution containing the relevant  
78 dose of pesticide was fed to the bee using a pipette inserted through a hole in the pot.

## 79 **Statistical analysis**

80 We employed the AIC-IT approach as this does not only test the support for the null hypothesis but also  
81 the plausibility of the alternative hypothesis or hypotheses, making it appropriate for use in controlled  
82 experiments as well as observational studies (Lukacs *et al.* 2007; Richards, Whittingham & Stephens  
83 2011). In addition, we view the AIC-IT approach as providing further advantages over the Fisherian  
84 approach because in cases where two or more models are almost as good (have similar AIC values), it  
85 is possible to perform model averaging to get a more accurate estimate of effect size based on weighted  
86 support (Johnson & Omland 2004). Quoting effect sizes and confidence intervals rather than p-values  
87 is based on current recommended practice (Nakagawa & Cuthill 2007; Halsey *et al.* 2015).

88 AIC was chosen over AICc (corrected AIC for small sample sizes) as AICc can be overly conservative  
89 and has been shown to have little advantage over AIC (Richards 2005; Raffalovich *et al.* 2008). The R  
90 packages glmmADMB (Skaug *et al.* 2014), survival (Therneau 2015), MuMIn (Barton 2015), plotrix  
91 (Lemon 2006) and lattice (Sarkar 2008) were used for model fitting and producing graphs.

## 92 **Pilot study**

93 Before the experiment began, 14 bees from a separate colony were tested on the RAM to confirm that  
94 bees would interact with the maze and feed from the artificial flowers and to ascertain the number of  
95 training bouts needed before asymptotic performance was reached. Ten training bouts were used  
96 because the data for both correct choices in first the eight choices and total revisits showed performance  
97 reached an asymptote by bout ten (Fig. S2).

108 Six bees were also tested on a partially baited version of the maze to ensure bees were not able to detect  
109 the presence of a reward behind the flowers (e.g. by olfaction). Four flowers were randomly selected to  
110 be baited and the first four unique (non-repeated) flower visits recorded. Mean number of visits to baited  
111 flowers in the first four unique choices was 1.83, which was not significantly different from the chance  
112 expectation of 2 (one-sample t-test,  $t=-0.30715$ ,  $df=5$ ,  $p=0.7711$ ).

### 103 **Supporting Results and Discussion**

104 Repeating the analysis excluding bees that did not visit all eight flowers ( $n=13$ ) did not affect the  
105 outcome so the final analysis includes all 61 bees.

#### 106 *Total revisits*

107 Analysing the full dataset but omitting the positive control still showed an effect on total revisits at  
108 field-realistic doses. Removing the high dose reduced support for the model containing a size \*  
109 treatment interaction but increased support for the other models including treatment (Table S2). Model  
110 averaged effect size estimates (MAE) showed a significant difference between LD.091 and the control  
111 (MAE = 0.417, 95% CIs = [0.027– 0.807], Table S3), indicating that this field-realistic dose increased  
112 total revisits.

113 One observation included a bee in the high treatment group with thorax width 6.07mm and 28 total  
114 revisits. To examine the effect of this observation on the treatment \* size interaction found for total  
115 revisits, we repeated the analysis without this data point. Removing the observation reduced support for  
116 the model containing the treatment \* size interaction ( $\Delta AIC$  to best model: 2.84) although the treatment  
117 \* size interaction at the high treatment level was still significant in that model (estimate = 2.291, 95%  
118 CIs = [0.311 – 4.271]) . Model averaging of the new best model set (treatment, size and basic) showed  
119 a significant positive effect of treatment on total revisits in the high dose (model averaged estimate =  
120 0.434, 95% CIs = [0.001 – 0.867]), despite the highest total revisits value having been omitted.

#### 121 *Correct choices before first revisit*

122 Analysing the data without the positive control did not change the outcome, with the model containing  
123 treatment only having the lowest AIC ( $\Delta$ AIC to next best model = 2) with the hazard ratio (HR) for  
124 LD.091 positive and significantly different to the control (HR = 2.276, 95% CIs = [1.077– 4.810], Table  
125 S3).

#### 126 *Monte Carlo simulation and behaviour on the RAM*

127 Holding the bee in the tunnel for 45 minutes following pesticide exposure did not visibly decrease  
128 motivation (bees flew directly to the array on entering the arena) and had no effect on maze performance  
129 (no difference between final training bout and testing bout in control bees for total revisits ( $t = 0.458$ ,  
130  $df = 27.0$ ,  $p = 0.651$ ), correct choices in the first eight choices ( $t = -1.0132$ ,  $df = 27.908$ ,  $p = 0.3197$ )  
131 and correct choices before first revisit ( $t = -1.395$ ,  $df = 29.5$ ,  $p = 0.174$ )).

132 The Monte Carlo simulations may overestimate total revisits as choices are made continuously until all  
133 eight flowers have been visited, whereas bees have physical limitations which are likely to restrict the  
134 total number of choices that can be made. To assess this, a conservative upper limit for number of  
135 revisits (18; two standard deviations above the observed mean) was applied to both the observed and  
136 C+S simulation data and the means recalculated. The simulated means remained outside the 95% CIs  
137 of the observed data (C = 9.94, C+S = 9.95, observed = 5.14[3.84-6.45]). Only bouts where all eight  
138 flowers were visited were included in the total revisits analysis ( $n=30$ ). Every arrival at a flower (“visit”,  
139 “revisit”, “land” and “approach”) was included in the transition probability matrix (Fig. S1a).

140 Stereotypical behaviour improved simulated RAM performance in terms of correct choices before the  
141 first revisit and correct choices in the first eight choices (see Fig. 5 in main text), due in part to the  
142 moderate contiguity (“nearest neighbour”) preference and a low probability of revisiting the flower last  
143 visited. However, stereotypical behaviour increased total revisits; the most likely explanation for this is  
144 the unequal total frequencies with which each flower was visited (Fig. S1a). The contiguity preference  
145 and tendency to travel upwards is consistent with known bumblebee foraging behaviour (Pyke 1978).

146

147 Interestingly, bumblebee RAM performance (mean correct choices in the first eight choices (C) = 5.9)  
148 was not as high as in rats, for whom the maze was designed (C = 7.6; Bond, Cook & Lamb 1981), or  
149 other vertebrates including blue tits (C = 6.8; Hilton & Krebs 1990), *Betta splendens* (C = 6.6; Roitblat,  
150 Tham & Golub 1982) and pigeons (C = 6.3; Bond, Cook & Lamb 1981). This comparatively low but  
151 better-than-chance performance is consistent with two previous studies using an analogue of the RAM  
152 in honeybees (Brown & Demas 1994; Brown *et al.* 1997).

153 The success of applying our modified RAM to bumblebees is likely due to their ecological requirements  
154 as nectarivores, as the apparatus has been shown to be most relevant in species for whom the test mimics  
155 natural foraging ecology (Bond, Cook & Lamb 1981; Sulikowski & Burke 2010). Furthermore, bees  
156 perform a repeated foraging bout behaviour that can be exploited for this task. As such there is  
157 considerable potential for the application of this established lab technique in the study of the quantitative  
158 effects of pesticides and other stressors such as parasites on bumblebee cognition and learning  
159 behaviours.

160

## 161 **References**

- 162 Balda, R.P. & Kamil, A. (1988) The spatial memory of Clark's nutcrackers (*Nucifraga columbiana*) in  
163 an analogue of the radial arm maze. *Animal Learning & Behavior*, **16**, 116-122.
- 164 Barton, K. (2015) MuMIn: Multi-Model Inference.
- 165 Bond, A.B., Cook, R.G. & Lamb, M.R. (1981) Spatial memory and the performance of rats and  
166 pigeons in the radial-arm maze. *Animal Learning & Behavior*, **9**, 575-580.
- 167 Brown, M.F. & Demas, G.E. (1994) Evidence for spatial working memory in honeybees (*Apis*  
168 *mellifera*). *Journal of Comparative Psychology*, **108**, 344-352.
- 169 Brown, M.F., Moore, J.A., Brown, C.H. & Langheld, K.D. (1997) The existence and extent of spatial  
170 working memory ability in honeybees. *Animal Learning & Behavior*, **25**, 473-484.
- 171 Burmeister, S., Couvillon, P. & Bitterman, M. (1995) Performance of honeybees in analogues of the  
172 rodent radial maze. *Animal Learning & Behavior*, **23**, 369-375.
- 173 EFSA (2012) Statement on the findings in recent studies investigating sub-lethal effects in bees of  
174 some neonicotinoids in consideration of the uses currently authorised in Europe. *EFSA*  
175 *Journal*, **10**, 27.
- 176 Foreman, N. & Ermakova, I. (1998) The Radial Arm Maze: Twenty Years On. *A Handbook of Spatial*  
177 *Research Paradigms and Methodologies* (eds N. Foreman & R. Gillett). Psychology Press,  
178 Hove.
- 179 Halsey, L.G., Curran-Everett, D., Vowler, S.L. & Drummond, G.B. (2015) The fickle P value  
180 generates irreproducible results. *nature methods*, **12**, 179-185.
- 181 Healy, S. & Hurly, T. (1995) Spatial memory in rufous hummingbirds (*Selasphorus rufus*): a field  
182 test. *Animal Learning & Behavior*, **23**, 63-68.
- 183 Heinrich, B. (1979) *Bumblebee Economics*, 1st edn. Harvard University Press.

184 Henry, M., Beguin, M., Requier, F., Rollin, O., Odoux, J.-F., Aupinel, P., Aptel, J., Tchamitchian, S.  
185 & Decourtye, A. (2012) A common pesticide decreases foraging success and survival in  
186 honey bees. *Science*, **336**, 348-350.

187 Hilton, S.C. & Krebs, J.K. (1990) Spatial memory of four species of Parus: performance in an open-  
188 field analogue of a radial maze. *The Quarterly Journal of Experimental Psychology*, **42**, 345-  
189 368.

190 Johnson, J.B. & Omland, K.S. (2004) Model selection in ecology and evolution. *Trends in ecology &*  
191 *evolution*, **19**, 101-108.

192 Lemon, J. (2006) Plotrix: a package in the red light district of R. *R-News*, **6**, 8-12.

193 Lukacs, P.M., Thompson, W.L., Kendall, W.L., Gould, W.R., DOHERTY, P.F., Burnham, K.P. &  
194 Anderson, D.R. (2007) Concerns regarding a call for pluralism of information theory and  
195 hypothesis testing. *Journal of Applied Ecology*, **44**, 456-460.

196 Nakagawa, S. & Cuthill, I.C. (2007) Effect size, confidence interval and statistical significance: a  
197 practical guide for biologists. *Biological Reviews*, **82**, 591-605.

198 Olton, D.S. & Samuelson, R.J. (1976) Remembrance of places passed: Spatial memory in rats.  
199 *Journal of Experimental Psychology: Animal Behavior Processes*, **2**, 97.

200 Pierre, J., Mesquida, J., Marilleau, R., Pham-Delègue, M. & Renard, M. (1999) Nectar secretion in  
201 winter oilseed rape, *Brassica napus*—quantitative and qualitative variability among 71  
202 genotypes. *Plant Breeding*, **118**, 471-476.

203 Pilling, E., Campbell, P., Coulson, M., Ruddle, N. & Tornier, I. (2013) A Four-Year Field Program  
204 Investigating Long-Term Effects of Repeated Exposure of Honey Bee Colonies to Flowering  
205 Crops Treated with Thiamethoxam. *PloS one*, **8**, e77193.

206 Pohorecka, K., Skubida, P., Miszczak, A., Semkiw, P., Sikorski, P., Zagibajło, K., Teper, D.,  
207 Kołtowski, Z., Skubida, M. & Zdańska, D. (2012) Residues of neonicotinoid insecticides in  
208 bee collected plant materials from oilseed rape crops and their effect on bee colonies. *Journal*  
209 *of Apicultural Science*, **56**, 115-134.

210 Pyke, G. & Cartar, R. (1992) The flight directionality of bumblebees: do they remember where they  
211 came from? *Oikos*, 321-327.

212 Pyke, G.H. (1978) Optimal foraging in bumblebees and coevolution with their plants. *Oecologia*, **36**,  
213 281-293.

214 Raffalovich, L.E., Deane, G.D., Armstrong, D. & Tsao, H.-S. (2008) Model selection procedures in  
215 social research: Monte-Carlo simulation results. *Journal of Applied Statistics*, **35**, 1093-1114.

216 Richards, S.A. (2005) Testing ecological theory using the information-theoretic approach: examples  
217 and cautionary results. *Ecology*, **86**, 2805-2814.

218 Richards, S.A., Whittingham, M.J. & Stephens, P.A. (2011) Model selection and model averaging in  
219 behavioural ecology: the utility of the IT-AIC framework. *Behavioral Ecology and*  
220 *Sociobiology*, **65**, 77-89.

221 Roitblat, H., Tham, W. & Golub, L. (1982) Performance of *Betta splendens* in a radial arm maze.  
222 *Animal Learning & Behavior*, **10**, 108-114.

223 Sanchez-Bayo, F. & Goka, K. (2014) Pesticide Residues and Bees – A Risk Assessment. *PloS one*, **9**,  
224 e94482.

225 Sarkar, D. (2008) *Lattice: Multivariate Data Visualization with R*. Springer, New York.

226 Skaug, H., Fournier, D., Bolker, B., Magnusson, A. & Nielsen, A. (2014) *\_Generalized Linear Mixed*  
227 *Models using AD Model Builder\_*.

228 Stanley, D.A., Smith, K.E. & Raine, N.E. (2015) Bumblebee learning and memory is impaired by  
229 chronic exposure to a neonicotinoid pesticide. *Scientific reports*, **5**.

230 Sulikowski, D. & Burke, D. (2010) Reward type influences performance and search structure of an  
231 omnivorous bird in an open-field maze. *Behavioural processes*, **83**, 31-35.

232 Therneau, T. (2015) *\_A Package for Survival Analysis in S\_*.

233 Thompson, H., Harrington, P., Wilkins, S., Pietravalle, S., Sweet, D. & Jones, A. (2013) Effects of  
234 neonicotinoid seed treatments on bumble bee colonies under field conditions. *FERA Report*,  
235 pp. 76. FERA, York.



| <b>a</b> Correct choices in first eight choices |            |              |              |
|-------------------------------------------------|------------|--------------|--------------|
| Model                                           | AIC        | $\Delta$ AIC | $w_i$        |
| <b>Basic</b>                                    | <b>542</b> | <b>0</b>     | <b>0.525</b> |
| <b>Size</b>                                     | <b>543</b> | <b>0.92</b>  | <b>0.331</b> |
| Treatment                                       | 545.6      | 3.52         | 0.09         |
| Treatment + size                                | 546.7      | 4.66         | 0.051        |
| Treatment * size                                | 552.1      | 10.09        | 0.003        |
| <b>b</b> Time per visit                         |            |              |              |
| Model                                           | AIC        | $\Delta$ AIC | $w_i$        |
| <b>Size</b>                                     | <b>15</b>  | <b>0</b>     | <b>0.913</b> |
| Basic                                           | 20.2       | 5.26         | 0.066        |
| Treatment + size                                | 22.7       | 7.71         | 0.019        |
| Treatment * size                                | 28.3       | 13.34        | 0.001        |
| Treatment                                       | 32         | 17.06        | 0            |

237

238 **Table S1.** Tables of candidate models to investigate the effect of pesticide treatment and bee size on a)  
 239 correct choices in first eight choices using binomial GLMMs and b) duration divided by total visits  
 240 using linear mixed models. The basic model included the constant and the residual variance, with all  
 241 other models containing the basic model plus the indicated covariates. Models are presented in order of  
 242  $\Delta$ AIC from the best model alongside their respective Akaike weights ( $w_i$ ). The best set of models  
 243 (models  $<2 \Delta$ AIC from the model with the lowest AIC) is highlighted in bold.

244

| <b>a</b> Total revisits               |              |              |              |
|---------------------------------------|--------------|--------------|--------------|
| Model                                 | AIC          | $\Delta$ AIC | $w_i$        |
| <b>Treatment</b>                      | <b>285.3</b> | <b>0</b>     | <b>0.303</b> |
| <b>Treatment + Size</b>               | <b>285.7</b> | <b>0.3</b>   | <b>0.256</b> |
| <b>Size</b>                           | <b>286.1</b> | <b>0.7</b>   | <b>0.209</b> |
| <b>Basic</b>                          | <b>286.3</b> | <b>1.0</b>   | <b>0.186</b> |
| Treatment * Size                      | 289.1        | 3.8          | 0.046        |
| <b>b</b> Choices before first revisit |              |              |              |
| Model                                 | AIC          | $\Delta$ AIC | $w_i$        |
| <b>Treatment</b>                      | <b>273</b>   | <b>0</b>     | <b>0.474</b> |
| Treatment + Size                      | 275          | 2            | 0.174        |
| Size                                  | 275.5        | 2.5          | 0.136        |
| Basic                                 | 275.6        | 2.6          | 0.129        |
| Treatment * Size                      | 276.4        | 3.4          | 0.087        |
| <b>c</b> Time per visit               |              |              |              |
| Model                                 | AIC          | $\Delta$ AIC | $w_i$        |
| <b>Size</b>                           | <b>13</b>    | <b>0</b>     | <b>0.75</b>  |
| Basic                                 | 15.6         | 2.55         | 0.209        |
| Treatment + Size                      | 19.3         | 6.32         | 0.032        |
| Treatment * Size                      | 22.3         | 9.33         | 0.007        |
| Treatment                             | 24.6         | 11.55        | 0.002        |

245

246 **Table S2.** Analysis including field-realistic doses only of the effect of pesticide on RAM performance  
247 measures. Tables show candidate models a) using negative binomial GLMMs to investigate the effect  
248 of pesticide treatment and bee size on total revisits, b) using Cox proportional hazards models to  
249 investigate the effect of pesticide treatment and bee size on choices before first revisit and c) using  
250 linear mixed models to investigate the effect of pesticide treatment and bee size on log-transformed  
251 duration divided by total visits. In all cases, the basic model included the constant and the residual  
252 variance, with all other models containing the basic model plus the indicated covariates. Models are  
253 presented in order of  $\Delta$ AIC from the best model alongside their respective Akaike weights ( $w_i$ ). The  
254 best sets of models which were averaged to obtain model averaged estimates (models  $<2$   $\Delta$ AIC from  
255 the model with the lowest AIC) are highlighted in bold.

256

| a                                    |                            |                    |                                |                         |              |
|--------------------------------------|----------------------------|--------------------|--------------------------------|-------------------------|--------------|
| Total revisits                       |                            |                    |                                |                         |              |
| Parameters                           | Estimate                   | Std. Error         | 95% CIs                        |                         |              |
|                                      |                            |                    | Lower                          | Upper                   |              |
| (Intercept)                          | 3.167                      | 1.513              | 0.202                          | 6.132                   |              |
| Treatment (LD.377)                   | 0.344                      | 0.205              | -0.058                         | 0.745                   |              |
| <b>Treatment (LD.091)</b>            | <b>0.417</b>               | <b>0.199</b>       | <b>0.027</b>                   | <b>0.807</b>            |              |
| Size                                 | -0.358                     | 0.259              | -0.865                         | 0.150                   |              |
| b                                    |                            |                    |                                |                         |              |
| Correct choices before first revisit |                            |                    |                                |                         |              |
| Parameters                           | Regression coefficient (b) | Std. Error (SE(b)) | Hazard Ratio (e <sup>b</sup> ) | 95% CIs on Hazard Ratio |              |
|                                      |                            |                    |                                | Lower                   | Upper        |
| Treatment (LD.377)                   | 0.295                      | 0.366              | 1.343                          | 0.656                   | 2.751        |
| <b>Treatment (LD.091)</b>            | <b>0.823</b>               | <b>0.382</b>       | <b>2.276</b>                   | <b>1.077</b>            | <b>4.810</b> |
| c                                    |                            |                    |                                |                         |              |
| Time per visit                       |                            |                    |                                |                         |              |
| Parameters                           | Estimate                   | Std. Error         | 95% CIs                        |                         |              |
|                                      |                            |                    | Lower                          | Upper                   |              |
| (Intercept)                          | 1.563                      | 0.643              | 0.302                          | 2.824                   |              |
| <b>Size</b>                          | <b>-0.323</b>              | <b>0.118</b>       | <b>-0.555</b>                  | <b>-0.091</b>           |              |

257

258 **Table S3.** Analysis including field-realistic doses only of the effect of pesticide on RAM performance  
259 measures. Tables show model averaged coefficients and 95% confidence intervals (CIs) for the optimal  
260 model set to predict a) total revisits (treatment, treatment + size, size only and basic models with colony  
261 as a random effect), b) correct choices before first revisit (treatment only model) and c) time per visit  
262 (duration divided by total visits; size only model with colony as a random effect). Parameters  
263 highlighted in bold are considered important to the model based on 95% CIs.

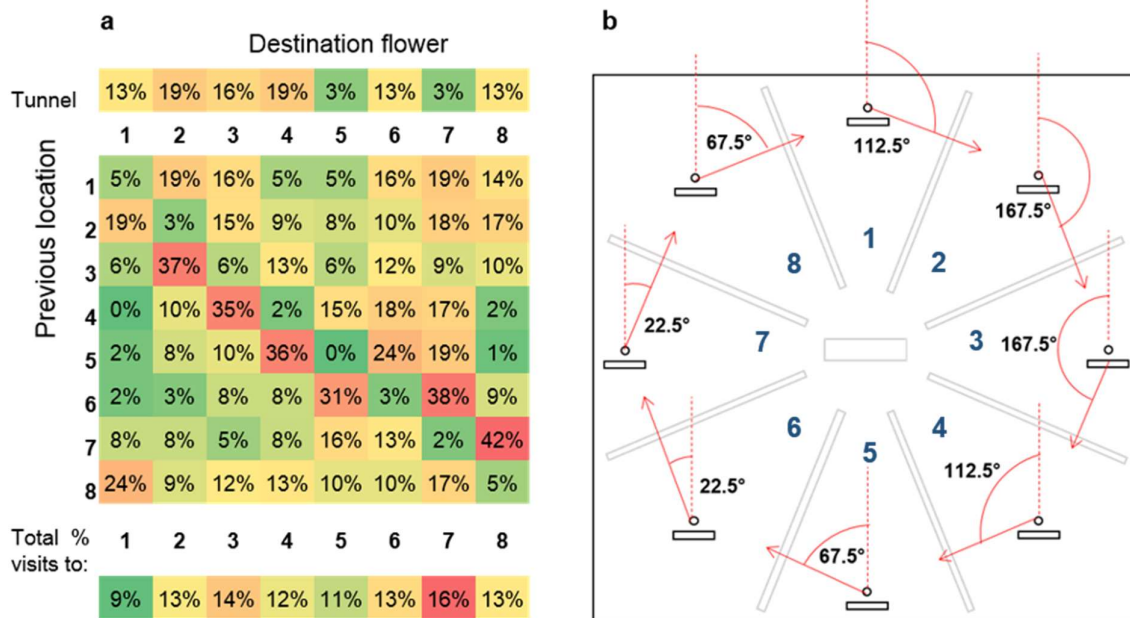

264

265 **Figure S1.** a) Global transition probability matrix showing probabilities of moving from the tunnel  
 266 (arena entrance) or a flower to each other possible flower. This was used to construct a Monte Carlo  
 267 simulation of performance on the radial arm maze (RAM) using stereotypical behaviour only. b)  
 268 Schematic of the RAM with the angle from vertical of each transition between neighbouring flowers.  
 269 Angle from vertical was negatively correlated with transition probability (Spearman's rho = -0.87).

270

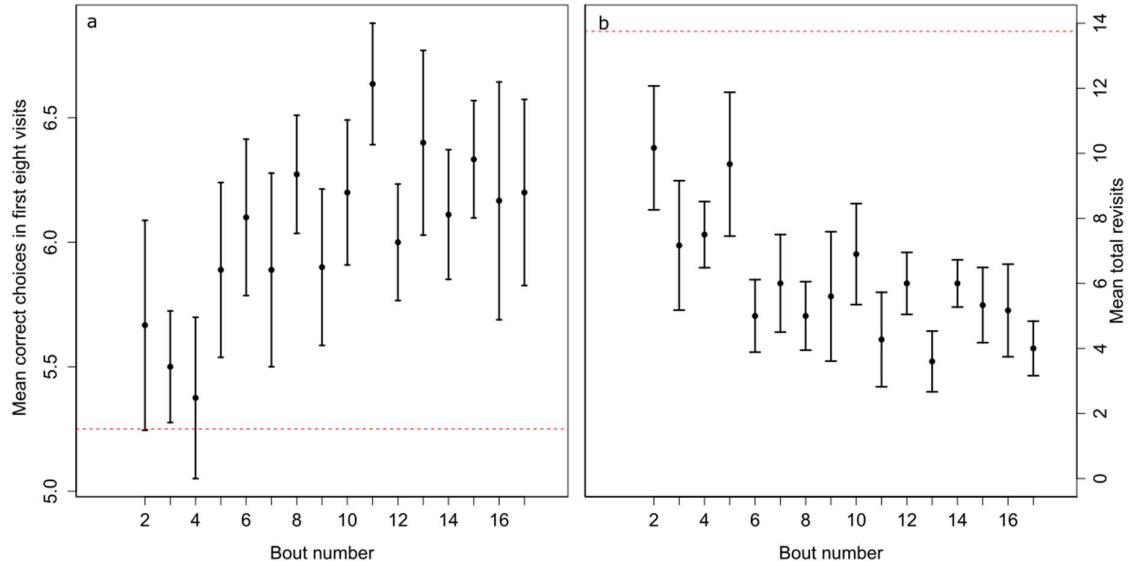

271

272 **Figure S2.** Data from a pilot study using 14 bees showing a) mean correct choices in first eight choices  
 273 ( $\pm$ SE) and b) mean total revisits ( $\pm$ SE) by bout number. Expected chance performance for both measures  
 274 is indicated by a red dashed line.

275

276

277

278

279 **Figure S3.** (*Below*) Outputs of two Monte Carlo simulations run with 1,000,000 iterations simulating  
 280 a) pure chance (C) and b) chance plus stereotypical behaviour (C+S), showing frequency tables and  
 281 means for three measures of RAM performance: correct choices in first eight choices, correct choices  
 282 before first revisit and total revisits. The frequency tables for total revisits are truncated at 75 revisits,  
 283 although the actual data from which the means are calculated include values greater than 75. Mean total  
 284 revisits with revisits capped at 18 is also shown to account for physical limitations on maximum number  
 285 of revisits in the observed data. The simulations were coded using C++.

286

| Mean total revisits |           | a) Chance |
|---------------------|-----------|-----------|
| Total revisits      | Frequency |           |
| 0                   | 2440      |           |
| 1                   | 8565      |           |
| 2                   | 17274     |           |
| 3                   | 27222     |           |
| 4                   | 37588     |           |
| 5                   | 46498     |           |
| 6                   | 52243     |           |
| 7                   | 56392     |           |
| 8                   | 58477     |           |
| 9                   | 58648     |           |
| 10                  | 58021     |           |
| 11                  | 55353     |           |
| 12                  | 52128     |           |
| 13                  | 48313     |           |
| 14                  | 44875     |           |
| 15                  | 41354     |           |
| 16                  | 37258     |           |
| 17                  | 33944     |           |
| 18                  | 30152     |           |
| 19                  | 27091     |           |
| 20                  | 24379     |           |
| 21                  | 21657     |           |
| 22                  | 19033     |           |
| 23                  | 17094     |           |
| 24                  | 15037     |           |
| 25                  | 13217     |           |
| 26                  | 11703     |           |
| 27                  | 10420     |           |
| 28                  | 9009      |           |
| 29                  | 7976      |           |
| 30                  | 6876      |           |
| 31                  | 6327      |           |
| 32                  | 5438      |           |
| 33                  | 4666      |           |
| 34                  | 4123      |           |
| 35                  | 3666      |           |
| 36                  | 3159      |           |
| 37                  | 2745      |           |
| 38                  | 2497      |           |
| 39                  | 2162      |           |
| 40                  | 1887      |           |
| 41                  | 1684      |           |
| 42                  | 1418      |           |
| 43                  | 1254      |           |
| 44                  | 1023      |           |
| 45                  | 922       |           |
| 46                  | 846       |           |
| 47                  | 777       |           |
| 48                  | 710       |           |
| 49                  | 586       |           |
| 50                  | 503       |           |
| 51                  | 453       |           |
| 52                  | 381       |           |
| 53                  | 303       |           |
| 54                  | 267       |           |
| 55                  | 240       |           |
| 56                  | 217       |           |
| 57                  | 198       |           |
| 58                  | 160       |           |
| 59                  | 147       |           |
| 60                  | 120       |           |
| 61                  | 114       |           |
| 62                  | 95        |           |
| 63                  | 75        |           |
| 64                  | 88        |           |
| 65                  | 57        |           |
| 66                  | 56        |           |
| 67                  | 54        |           |
| 68                  | 42        |           |
| 69                  | 38        |           |
| 70                  | 37        |           |
| 71                  | 28        |           |
| 72                  | 15        |           |
| 73                  | 28        |           |
| 74                  | 15        |           |
| 75                  | 13        |           |

| Mean total revisits |           | b) Chance + stereotypical behaviour |
|---------------------|-----------|-------------------------------------|
| Total revisits      | Frequency |                                     |
| 0                   | 2791      |                                     |
| 1                   | 9202      |                                     |
| 2                   | 17527     |                                     |
| 3                   | 26408     |                                     |
| 4                   | 34862     |                                     |
| 5                   | 41101     |                                     |
| 6                   | 46002     |                                     |
| 7                   | 48663     |                                     |
| 8                   | 50387     |                                     |
| 9                   | 50541     |                                     |
| 10                  | 49129     |                                     |
| 11                  | 47999     |                                     |
| 12                  | 45453     |                                     |
| 13                  | 42794     |                                     |
| 14                  | 40797     |                                     |
| 15                  | 37913     |                                     |
| 16                  | 34899     |                                     |
| 17                  | 32403     |                                     |
| 18                  | 29809     |                                     |
| 19                  | 27403     |                                     |
| 20                  | 24663     |                                     |
| 21                  | 22993     |                                     |
| 22                  | 20865     |                                     |
| 23                  | 19027     |                                     |
| 24                  | 17081     |                                     |
| 25                  | 15801     |                                     |
| 26                  | 14321     |                                     |
| 27                  | 12811     |                                     |
| 28                  | 11901     |                                     |
| 29                  | 10642     |                                     |
| 30                  | 9948      |                                     |
| 31                  | 8940      |                                     |
| 32                  | 8235      |                                     |
| 33                  | 7399      |                                     |
| 34                  | 6695      |                                     |
| 35                  | 6144      |                                     |
| 36                  | 5649      |                                     |
| 37                  | 5181      |                                     |
| 38                  | 4696      |                                     |
| 39                  | 4208      |                                     |
| 40                  | 3875      |                                     |
| 41                  | 3595      |                                     |
| 42                  | 3268      |                                     |
| 43                  | 2938      |                                     |
| 44                  | 2740      |                                     |
| 45                  | 2474      |                                     |
| 46                  | 2350      |                                     |
| 47                  | 2053      |                                     |
| 48                  | 1900      |                                     |
| 49                  | 1767      |                                     |
| 50                  | 1593      |                                     |
| 51                  | 1467      |                                     |
| 52                  | 1395      |                                     |
| 53                  | 1298      |                                     |
| 54                  | 1098      |                                     |
| 55                  | 1102      |                                     |
| 56                  | 936       |                                     |
| 57                  | 882       |                                     |
| 58                  | 783       |                                     |
| 59                  | 763       |                                     |
| 60                  | 692       |                                     |
| 61                  | 597       |                                     |
| 62                  | 598       |                                     |
| 63                  | 550       |                                     |
| 64                  | 472       |                                     |
| 65                  | 437       |                                     |
| 66                  | 409       |                                     |
| 67                  | 376       |                                     |
| 68                  | 351       |                                     |
| 69                  | 325       |                                     |
| 70                  | 302       |                                     |
| 71                  | 262       |                                     |
| 72                  | 247       |                                     |
| 73                  | 224       |                                     |
| 74                  | 214       |                                     |
| 75                  | 205       |                                     |

288 Fig. S3 cont.

289

290

| Mean choice accuracy |           |
|----------------------|-----------|
| Choice accuracy      | Frequency |
| 1                    | 0         |
| 2                    | 463       |
| 3                    | 19134     |
| 4                    | 170805    |
| 5                    | 420407    |
| 6                    | 319433    |
| 7                    | 67318     |
| 8                    | 2440      |

a) Chance

| Mean choices before first revisit |           |
|-----------------------------------|-----------|
| Choices                           | Frequency |
| 1                                 | 125031    |
| 2                                 | 218360    |
| 3                                 | 245646    |
| 4                                 | 205829    |
| 5                                 | 128236    |
| 6                                 | 57586     |
| 7                                 | 16872     |
| 8                                 | 2440      |

Mean choice accuracy: 5.25093  
Mean choices before first revisit: 3.24633  
Mean total revisits: 13.7449  
Mean total revisits (capped at 18): 9.93634  
23.3255% of bees screened out

| Mean choice accuracy |           |
|----------------------|-----------|
| Choice accuracy      | Frequency |
| 1                    | 0         |
| 2                    | 424       |
| 3                    | 17689     |
| 4                    | 157348    |
| 5                    | 409343    |
| 6                    | 337005    |
| 7                    | 75400     |
| 8                    | 2791      |

b) Chance + stereotypical behaviour

| Mean choices before first revisit |           |
|-----------------------------------|-----------|
| Choices                           | Frequency |
| 1                                 | 36932     |
| 2                                 | 199422    |
| 3                                 | 271827    |
| 4                                 | 243194    |
| 5                                 | 155058    |
| 6                                 | 70588     |
| 7                                 | 20188     |
| 8                                 | 2791      |

Mean choice accuracy: 5.30218  
Mean choices before first revisit: 3.5865  
Mean total revisits: 16.064  
Mean total revisits (capped at 18): 9.94618  
31.132% of bees screened out
